# Supplementary material for: Reconstitution of bacteriorhodopsin with cationic poly(dimethylaminoethyl acrylate)-block-poly(methylacrylate) for bio-hybrid materials
Source: Royal Society of Chemistry journal article supplement (doi:10.1039/c5ra21680j), 2016-01-01
Supplement: c5ra21680j1.pdf [file c5ra21680j1.pdf]

## Supporting Information

### Reconstitution of bacteriorhodopsin with cationic poly (dimethylaminoethyl acrylate)-block-poly (methylacrylate) for bio-hybrid materials

Weiwei He<sup>a</sup>, Jiaqi Ma<sup>b</sup>, Xiaowen Shu<sup>a</sup>, Jun Qian<sup>b</sup>, Daoben Hua<sup>ab\*</sup>

<sup>a</sup> School of Radiological and Interdisciplinary Sciences (RAD-X), Soochow University;  
Collaborative Innovation Center of Radiological Medicine of Jiangsu higher Education  
Institutions, Suzhou 215123, China.

<sup>b</sup> College of Chemistry, Chemical Engineering and Materials Science, Suzhou 215123, China.

#### Table of contents

|                 |    |
|-----------------|----|
| Scheme S1 ..... | S2 |
| Figure S1 ..... | S2 |
| Figure S2 ..... | S3 |
| Figure S3 ..... | S3 |
| Figure S4 ..... | S4 |
| Figure S5 ..... | S4 |
| Figure S6 ..... | S5 |
| Figure S7 ..... | S5 |

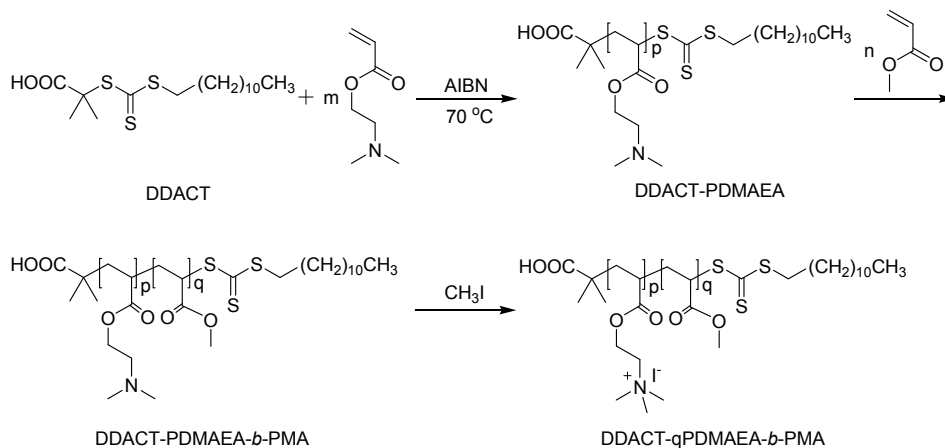

**Scheme S1.** Synthetic route of cationic amphiphilic copolymer by RAFT procedure.

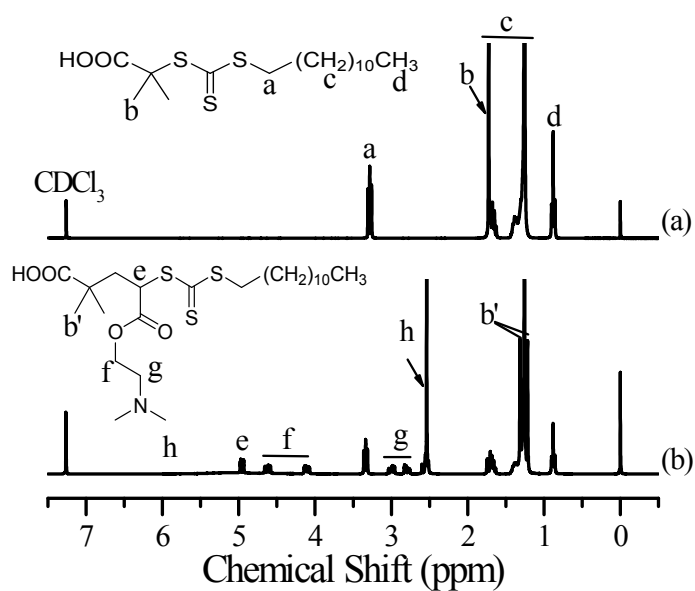

**Fig. S1**  $^1\text{H}$  NMR spectra of (a) DDACT and (b) DDACT-PDMAEA<sub>1</sub> (400 MHz,  $\text{CDCl}_3$ ).

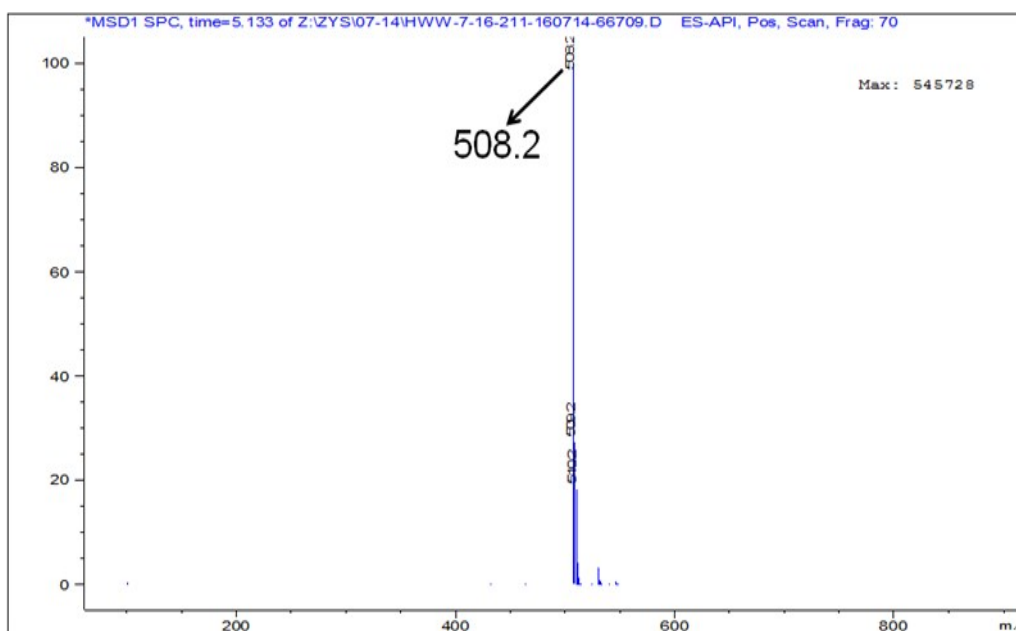

**Fig. S2** MS spectrum of DDACT-PDMAEA<sub>1</sub>.

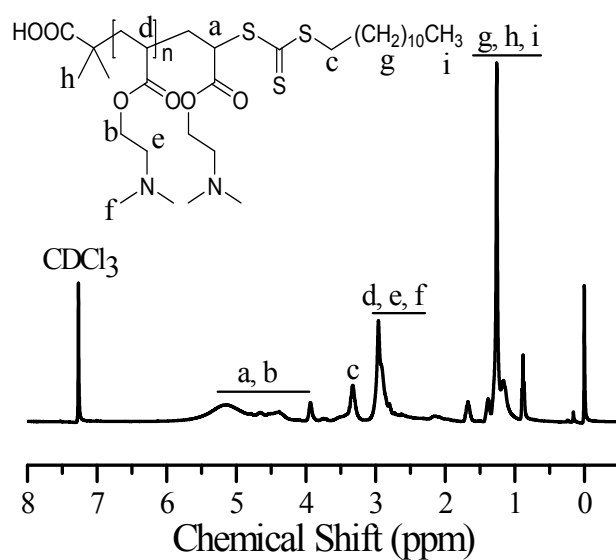

**Fig. S3** <sup>1</sup>H NMR spectra of DDACT-PDMAEA<sub>3</sub> (400 MHz, CDCl<sub>3</sub>).

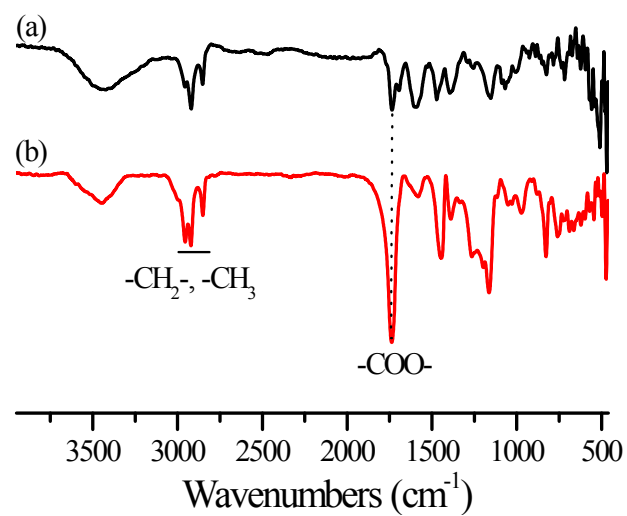

**Fig. S4** FT-IR spectra of (a) DDACT-PDMAEA<sub>3</sub> and (b) DDACT- PDMAEA<sub>3</sub>-*b*-PMA<sub>27</sub>.

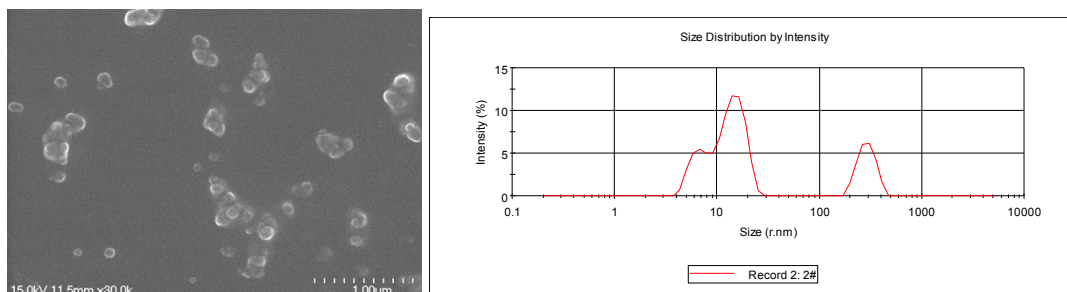

**Fig. S5** SEM image (left) and size distribution (right) of self-assembly of DDACT-qPDMAEA<sub>1</sub>-*b*-PMA<sub>7</sub>.

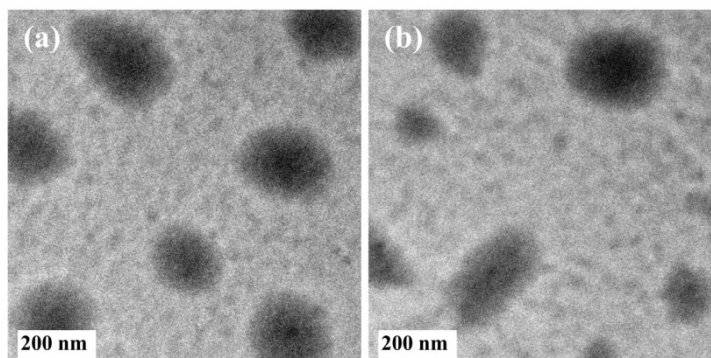

**Fig. S6** TEM images of assembly of DDACT-qPDMAEA<sub>3</sub>-b-PMA<sub>27</sub> (a) without and (b) with BR. Scale bar = 200 nm.

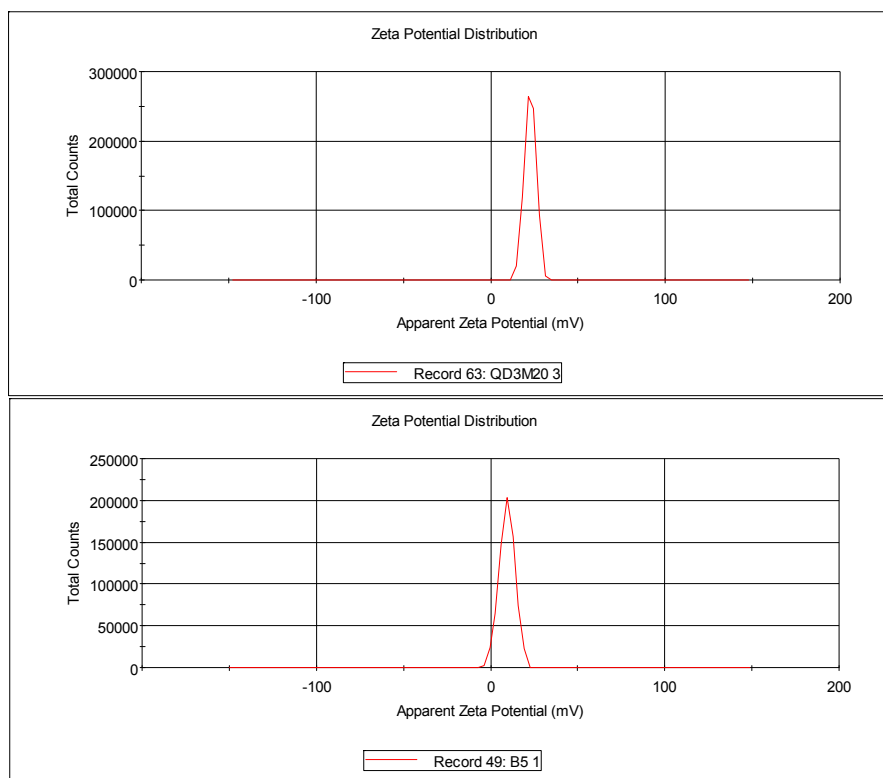

**Fig. S7** Zeta potentials of particles from DDACT-qPDMAEA<sub>3</sub>-b-PMA<sub>18</sub> before (top, 22.7 mV) and after (bottom, 9.46 mV) combination with BR.
